# Supplementary material for: Strategy to improve phase compatibility between proton conductive BaZr0.8Y0.2O3−δ and nickel oxide
Source: Royal Society of Chemistry journal article supplement (doi:10.1039/c5ra26947d), 2016-01-01
Supplement: c5ra26947d1.pdf [file c5ra26947d1.pdf]

Electronic Supplementary Information

**Strategy to Improve Phase Compatibility between Proton Conductive BaZr<sub>0.8</sub>Y<sub>0.2</sub>O<sub>3-δ</sub> and Nickel Oxide**

Donglin Han <sup>a,\*</sup>, Yuki Otani <sup>a</sup>, Yohei Noda <sup>a,b</sup>, Takayuki Onishi <sup>a</sup>, Masatoshi Majima <sup>b</sup>  
and Tetsuya Uda <sup>a,\*</sup>

<sup>a</sup> Department of Materials Science and Engineering, Kyoto University,  
Yoshida Honmachi, Sakyo-ku, Kyoto 606-8501, Japan

<sup>b</sup> Sumitomo Electric Industries, Ltd.,  
1-1-1, Koyakita, Itami-shi, Hyogo 664-0016, Japan

\* Corresponding authors: Donglin Han (han.donglin.8n@kyoto-u.ac.jp)  
and Tetsuya Uda (uda\_lab@aqua.mtl.kyoto-u.ac.jp)

TEL: +81-75-753-5445, FAX: +81-75-753-5284

**Fig. S1** shows the images of the  $\text{BaY}_2\text{NiO}_5$  pellet-like samples after heat-treating at 1500 and 1600 °C for various time and finally quenched in ambient atmosphere. The samples were directly placed on  $\text{Al}_2\text{O}_3$  plate-like crucibles. The XRD patterns of the residue of  $\text{BaY}_2\text{NiO}_5$  pellet-like samples are shown in **Fig. S2** and **S3**. It can be seen that products containing Al ( $\text{BaAl}_2\text{O}_4$  and  $\text{Ba}_3\text{Y}_2\text{AlO}_{7.5}$ ) formed. Such results indicate that  $\text{BaY}_2\text{NiO}_5$  reacted with the  $\text{Al}_2\text{O}_3$  crucibles. It is therefore not proper to directly place the  $\text{BaY}_2\text{NiO}_5$  samples on these  $\text{Al}_2\text{O}_3$  crucibles.

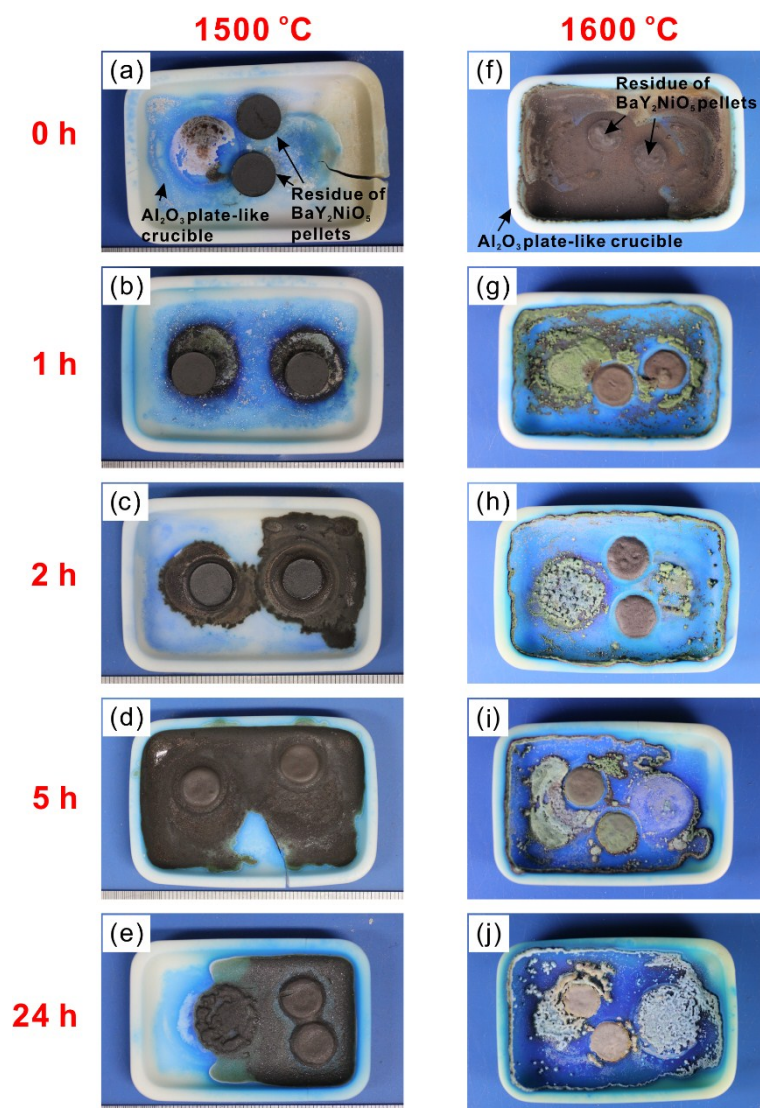

**Fig. S1** Optical images of  $\text{BaY}_2\text{NiO}_5$  pellets heat-treated at 1500 and 1600 °C in ambient atmosphere for various time. The  $\text{BaY}_2\text{NiO}_5$  pellets were directly placed on  $\text{Al}_2\text{O}_3$  plate-like crucibles. The heating rates from room temperature to 1000 °C, and 1000 °C to 1500 or 1600 °C were 4.17 and 3.33 °Cmin<sup>-1</sup>, respectively. All the pellets were finally quenched in ambient atmosphere.

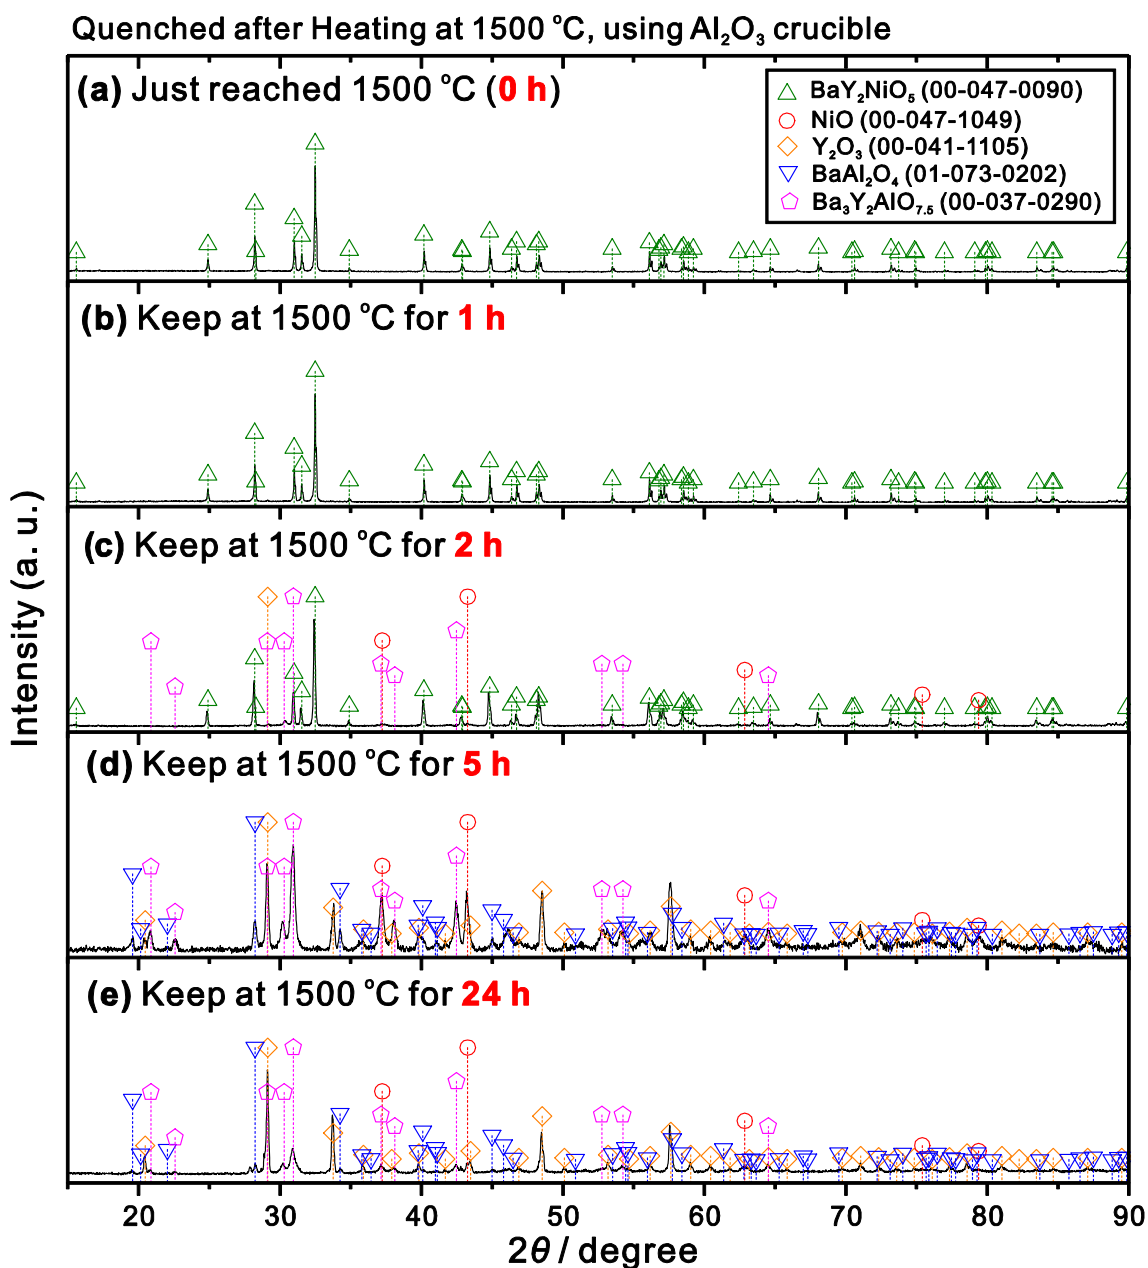

**Fig. S2** Powder XRD patterns of the residues of BaY<sub>2</sub>NiO<sub>5</sub> pellet-like samples heat-treated at 1500 °C for various time. The pellets were directly placed on Al<sub>2</sub>O<sub>3</sub> plate-like crucibles. All the pellets were finally quenched in ambient atmosphere. The heating rates from room temperature to 1000 °C, and 1000 °C to 1500 °C were 4.17 and 3.33 °Cmin<sup>-1</sup>, respectively. All the pellets were finally quenched in ambient atmosphere.

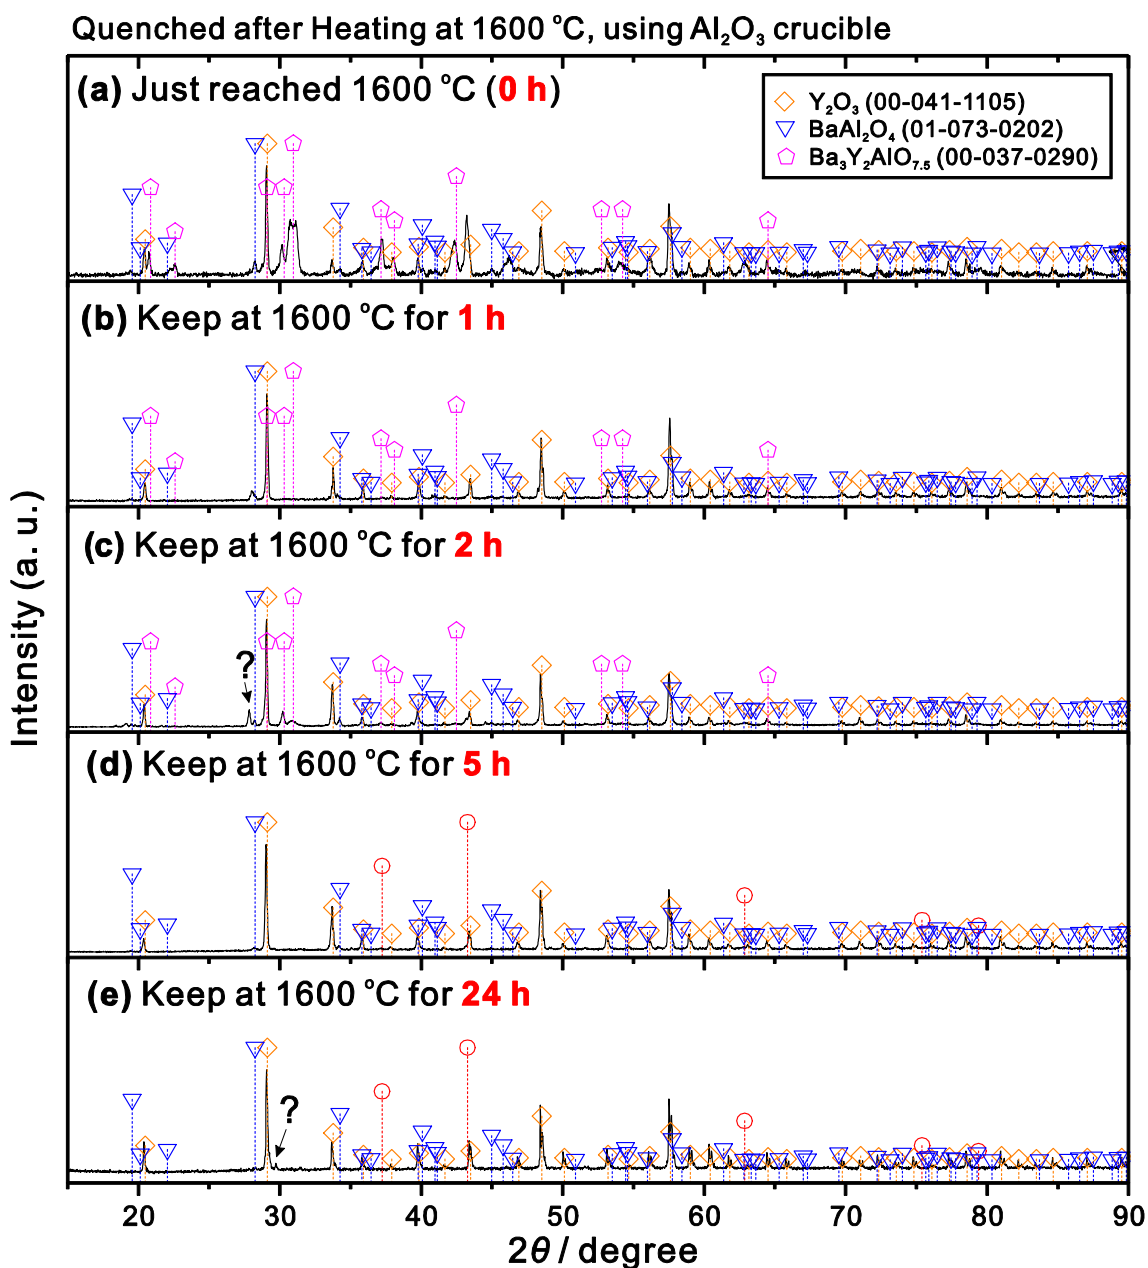

**Fig. S3** Powder XRD patterns of the residues of BaY<sub>2</sub>NiO<sub>5</sub> pellet-like samples heat-treated at 1600 °C for various time. The pellets were directly placed on Al<sub>2</sub>O<sub>3</sub> plate-like crucibles. All the pellets were finally quenched in ambient atmosphere. The heating rates from room temperature to 1000 °C, and 1000 °C to 1600 °C were 4.17 and 3.33 °Cmin<sup>-1</sup>, respectively. All the pellets were finally quenched in ambient atmosphere.

**Table S1** SEM-EDS point analysis results (cation ratio) on the surface of the BaY<sub>2</sub>NiO<sub>5</sub> pellet heat-treated at 1600 °C for 0 h (the sample was quenched in ambient atmosphere just after heating up to 1600 °C). The corresponding positions marked with number in **Fig. 6(a)** were examined.

| Position | Composition / at% |       |       | Possible main phase                                                                               |
|----------|-------------------|-------|-------|---------------------------------------------------------------------------------------------------|
|          | Ba                | Y     | Ni    |                                                                                                   |
| 1        | 23.50             | 57.04 | 19.46 | BaY <sub>2</sub> NiO <sub>5</sub>                                                                 |
| 2        | 22.35             | 58.85 | 18.81 |                                                                                                   |
| 3        | 41.23             | 26.58 | 32.19 | BaNiO <sub>2</sub> (main) + BaY <sub>2</sub> NiO <sub>5</sub> or Y <sub>2</sub> O <sub>3</sub>    |
| 4        | 54.63             | 1.96  | 43.41 | BaNiO <sub>2</sub>                                                                                |
| 5        | 55.90             | 2.14  | 41.95 |                                                                                                   |
| 6        | 14.93             | 70.72 | 13.34 | Y <sub>2</sub> O <sub>3</sub> adherent to BaNiO <sub>2</sub> or BaY <sub>2</sub> NiO <sub>5</sub> |

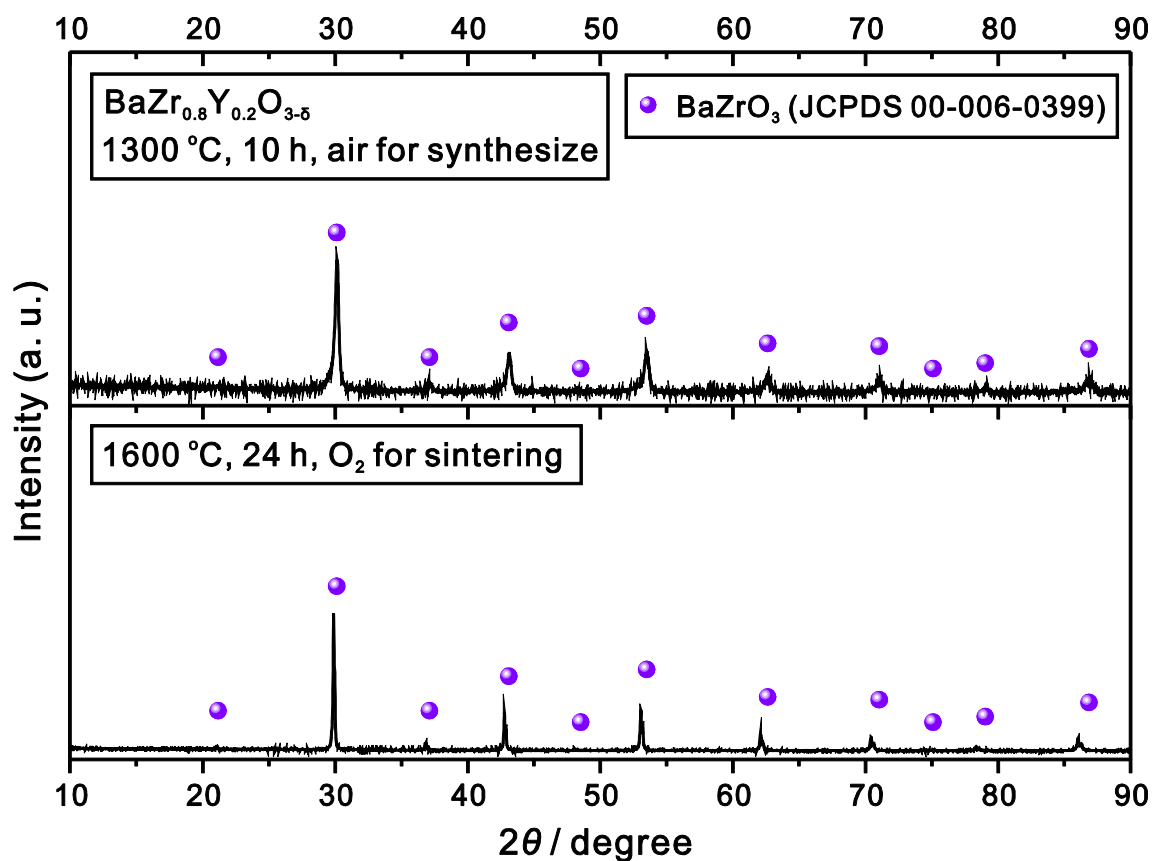

**Fig. S4** Powder XRD patterns of BZY20 heat-treated at 1300 °C in air for 10 h and 1600 °C in O<sub>2</sub> for 24 h for synthesizing and sintering, respectively. Only the peaks belonging to a single perovskite phase were observed after both the heat-treatment.

STEM-EDS was applied to determine the local composition of crystal grains. In order to avoid the interference between different grains, single grains without overlapping with others were preferred for STEM-EDS analysis. Examples on the STEM-EDS analysis on BZY20 finally heat-treated at 1300 and 1600 °C are given in **Fig. S5**, **S6**, and **Table S2**, **S3**.

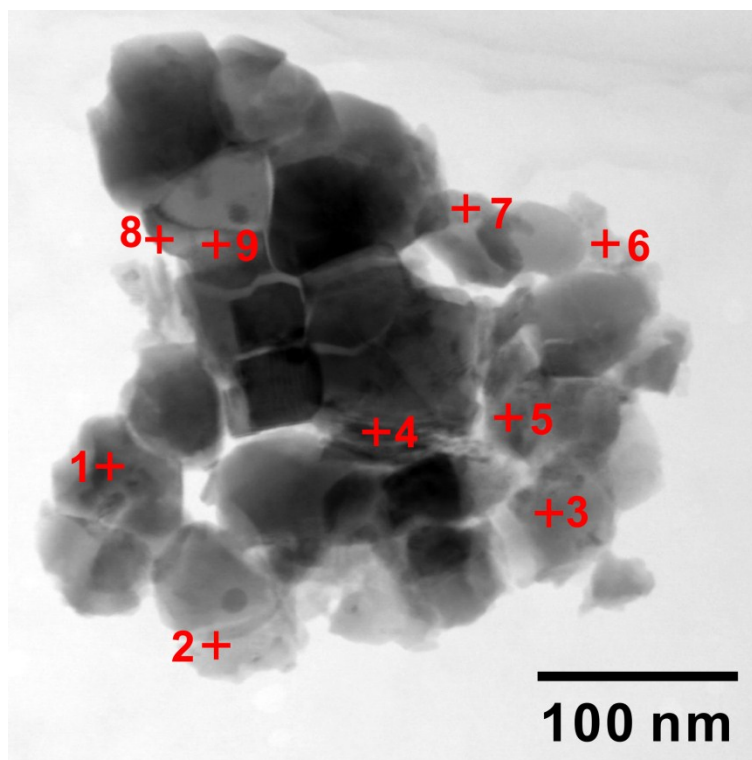

**Fig. S5** Positions for STEM-EDS point-analysis on BZY20 finally heat-treated at 1300 °C in ambient air for 10h, and pulverized by ball-milling for 100 h.

**Table S2** STEM-EDS point-analysis results on BZY20 which was finally heat-treated at 1300 °C in ambient atmosphere for 10 h, and pulverized by ball-milling for 100 h. The numbers are corresponding to the positions marked in **Fig. S5**.

| Number | Cation ratio / at% |       |       | Number | Cation ratio / at% |       |       |
|--------|--------------------|-------|-------|--------|--------------------|-------|-------|
|        | Ba                 | Zr    | Y     |        | Ba                 | Zr    | Y     |
| 1      | 51.57              | 45.05 | 3.37  | 6      | 44.47              | 44.41 | 11.12 |
| 2      | 50.98              | 39.71 | 9.31  | 7      | 52.70              | 34.67 | 12.63 |
| 3      | 51.59              | 43.56 | 4.85  | 8      | 51.44              | 46.82 | 1.75  |
| 4      | 14.38              | 43.48 | 42.15 | 9      | 49.41              | 48.36 | 2.23  |
| 5      | 54.42              | 37.00 | 8.58  |        |                    |       |       |

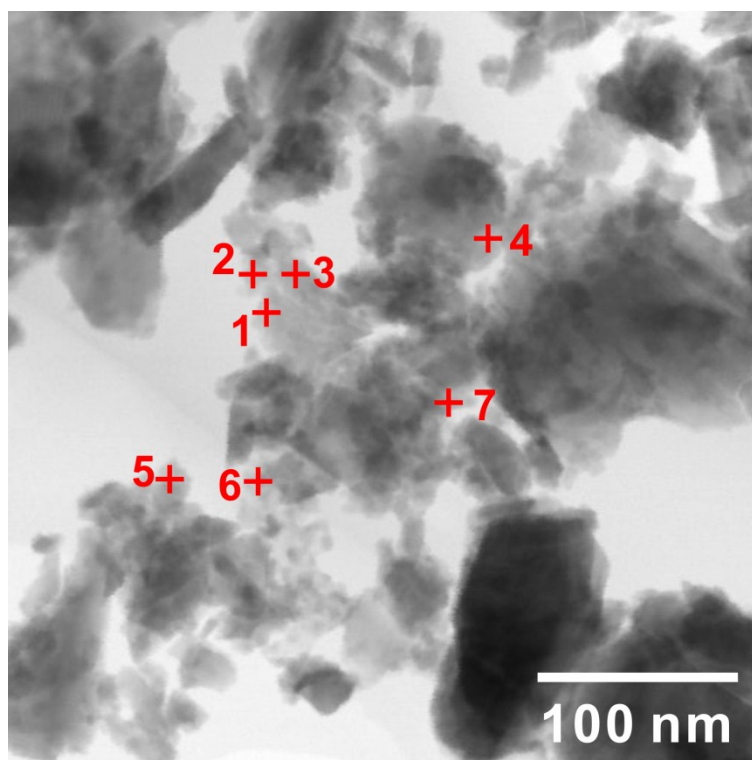

**Fig. S6** Positions for STEM-EDS point-analysis on BZY20 finally heat-treated at 1600 °C in O<sub>2</sub> for 24 h, and pulverized by ball-milling for 50 h.

**Table S3** STEM-EDS point-analysis results on BZY20 which was finally heat-treated at 1600 °C in O<sub>2</sub> for 24 h, and pulverized by ball-milling for 50 h. The numbers are corresponding to the positions marked in **Fig. S6**.

| Number | Cation ratio / at% |       |       | Number | Cation ratio / at% |       |       |
|--------|--------------------|-------|-------|--------|--------------------|-------|-------|
|        | Ba                 | Zr    | Y     |        | Ba                 | Zr    | Y     |
| 1      | 46.18              | 45.05 | 8.77  | 5      | 51.76              | 40.21 | 8.04  |
| 2      | 43.83              | 46.44 | 9.74  | 6      | 47.49              | 38.92 | 13.59 |
| 3      | 51.84              | 38.33 | 9.83  | 7      | 49.91              | 41.70 | 8.39  |
| 4      | 45.00              | 43.06 | 11.94 |        |                    |       |       |
